# Supplementary material for: mTor-signaling is required for the formation of proliferating Müller glia-derived progenitor cells in the chick retina
Source: Oxford University Press journal article supplement (doi:10.1242/dev.133215), 2016-01-01
Supplement: dev133215supp.pdf [file dev133215supp.pdf]

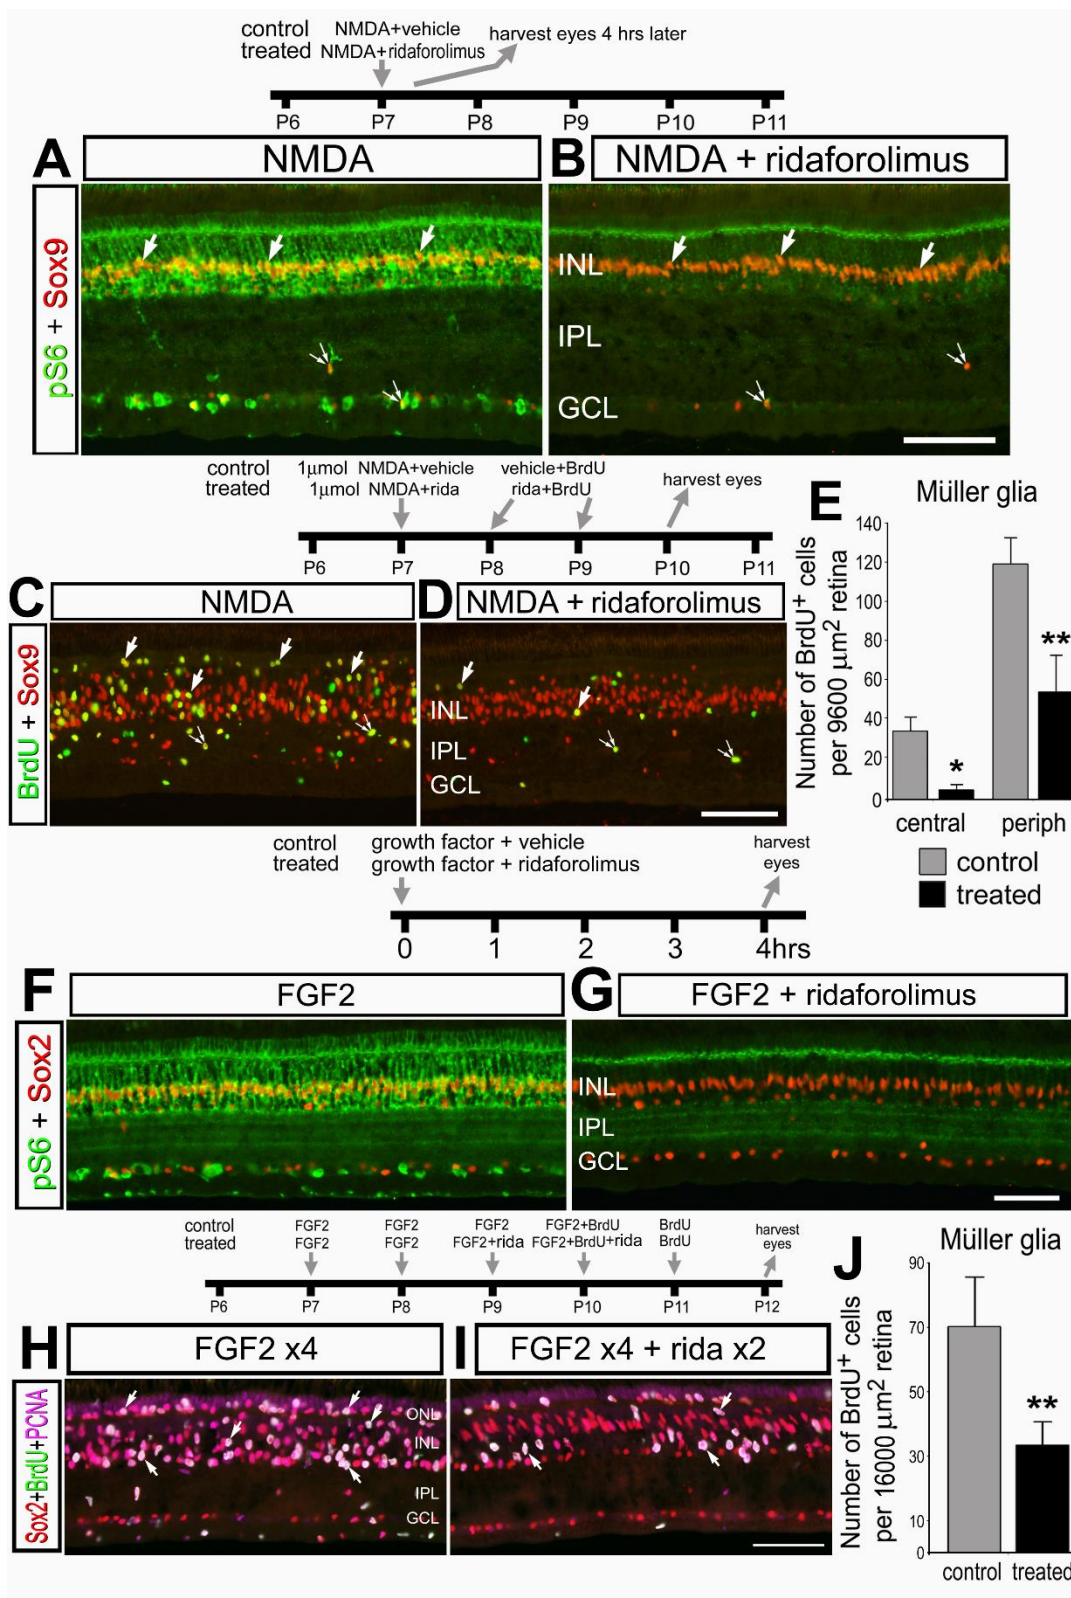

**Supplemental Figure 1.** Similar to the effects of rapamycin, the mTor-inhibitor ridaforolimus inhibits the induction of pS6 and the proliferation of MGPCs in NMDA-damaged and FGF2-treated retinas. The experimental paradigms are schematically

diagrammed above the relevant panels. Sections of the retina were labeled with antibodies to pS6 (green; A,B,F,G), Sox9 (red; A-D), BrdU (green; C, D, H, I), Sox2 (red; F-I), and PCNA (magenta; H, I). Arrows indicate the nuclei of Müller glia and/or MGPCs and small double-arrows indicate presumptive NIRG cells. Histograms in **E** and **J** illustrate the mean ( $\pm$ SD; n=4) number of proliferating Müller glia, NIRG cells and microglia in peripheral regions of control and treated retinas. Significance of difference (\*p<0.05, \*\*p<0.001) was determined by using an unpaired, two-tailed t-test. The calibration bar each panel represents 50  $\mu$ m. ONL – outer nuclear layer, INL – inner nuclear layer, IPL – inner plexiform layer, GCL – ganglion cell layer.

**Supplemental table 1.** Antibodies, sources and working dilutions. Patterns of labeling and stimulus-dependent changes in levels of immunolabeling using these antibodies are consistent with previous reports (Fischer and Omar, 2005; Fischer et al., 2009a,b; Fischer et al., 2014; Todd and Fischer, 2015).

| Antigen                                  | Working dilution | Host                 | Clone or catalog number | Source                                                          |
|------------------------------------------|------------------|----------------------|-------------------------|-----------------------------------------------------------------|
| pS6                                      | 1:400            | rabbit<br>monoclonal | #5364<br>Ser240/244     | Cell Signaling                                                  |
| pS6                                      | 1:750            | rabbit               | #2215;<br>Ser240/244    | Cell Signaling                                                  |
| pAkt                                     | 1:300            | rabbit               | #4060<br>Ser473         | Cell Signaling                                                  |
| HuD/C                                    | 1:100            | mouse                | 16A11                   | Invitrogen                                                      |
| Sox2                                     | 1:1000           | goat                 | Y-17                    | Santa Cruz Immunochemicals                                      |
| Brn3a<br>(Pou4F1)                        | 1:200            | mouse                | mab1585                 | Chemicon                                                        |
| neurofilament                            | 1:50             | mouse                | RT97                    | Developmental Studies<br>Hybridoma Bank (DSHB) Iowa City,<br>IA |
| Transferrin<br>binding protein<br>(TFBP) | 1:5000           | rabbit               | TFBP                    | Dr. J.J. Lucas, SUNY                                            |
| Egr1                                     | 1:1000           | goat                 | AF2818                  | R&D Systems                                                     |
| BrdU                                     | 1:200            | rat                  | OBT00030S               | AbD Serotec<br>Raleigh, NC                                      |
| BrdU                                     | 1:100            | mouse                | G3G4                    | DSHB                                                            |
| PCNA                                     | 1:1000           | mouse                | M0879                   | Dako Immunochemicals<br>Carpinteria, CA                         |
| CD45                                     | 1:200            | mouse                | HIS-C7                  | Cedi Diagnostic                                                 |
| p38 MAPK                                 | 1:400            | rabbit               | 12F8                    | Cell Signaling Technologies                                     |
| Top <sup>AP</sup>                        | 1:100            | mouse                | 2M6                     | Dr. P. Linser<br>University of Florida                          |
| Sox9                                     | 1:2000           | mouse                | AB5535                  | Chemicon                                                        |
| Nkx2.2                                   | 1:80             | mouse                | 74.5A5                  | DSHB                                                            |
| Pax6                                     | 1:50             | mouse                | PAX6                    | DSHB                                                            |
| Pax6                                     | 1:1000           | rabbit               | PRB-278P                | Covance                                                         |
| Klf4                                     | 1:50             | rabbit               | ARP38430                | Aviva Systems Biology                                           |

|           |       |        |       |                             |
|-----------|-------|--------|-------|-----------------------------|
| transitin | 1:80  | mouse  | EAP3  | DSHB                        |
| pERK1/2   | 1:200 | rabbit | 137F5 | Cell Signaling Technologies |
| cFos      | 1:400 | rabbit | K-25  | Santa Cruz Immunochemicals  |
| pCREB     | 1:500 | rabbit | 87G3  | Cell Signaling Technologies |

**Supplemental table 2:** Forward and reverse primer sequences (5' – 3') and predicted product sizes (in brackets).

| Gene name     | Forward                    | Reverse                    | Product size (bp) |
|---------------|----------------------------|----------------------------|-------------------|
| <i>notch1</i> | GGC TGG TTA TCA TGG AGT TA | CAT CCA CAT TGA TCT CAC AG | (154)             |
| <i>hes5</i>   | GGA GAA GGA GTT CCA GAG AC | AAT TGC AGA GCT TCT TTG AG | (143)             |
| <i>ascl1a</i> | AGG GAA CCA CGT TTA TGC AG | TTA TAC AGG GCC TGG TGA GC | (187)             |
| <i>c3aR</i>   | CACT CGC ATA TGC CAA CAG C | GCC TTT GCT CTG AAG TCC CT | (73)              |
| <i>c-myc</i>  | ACA CAA CTA CGC TGC TCC TC | TTC GCC TCT TGT CGT TCT CC | (154)             |
| <i>c3</i>     | TCC CCC ATG AGG AAT GGG AT | ATA GTC CAT GTC CCC AGG CT | (74)              |
| <i>gapdh</i>  | CAT CCA AGG AGT GAG CCA AG | TGG AGG AAG AAA TTG GAG GA | (161)             |
